# Supplementary material
Source: PubMed Central journal article supplement (PMC7842851)

Figure A

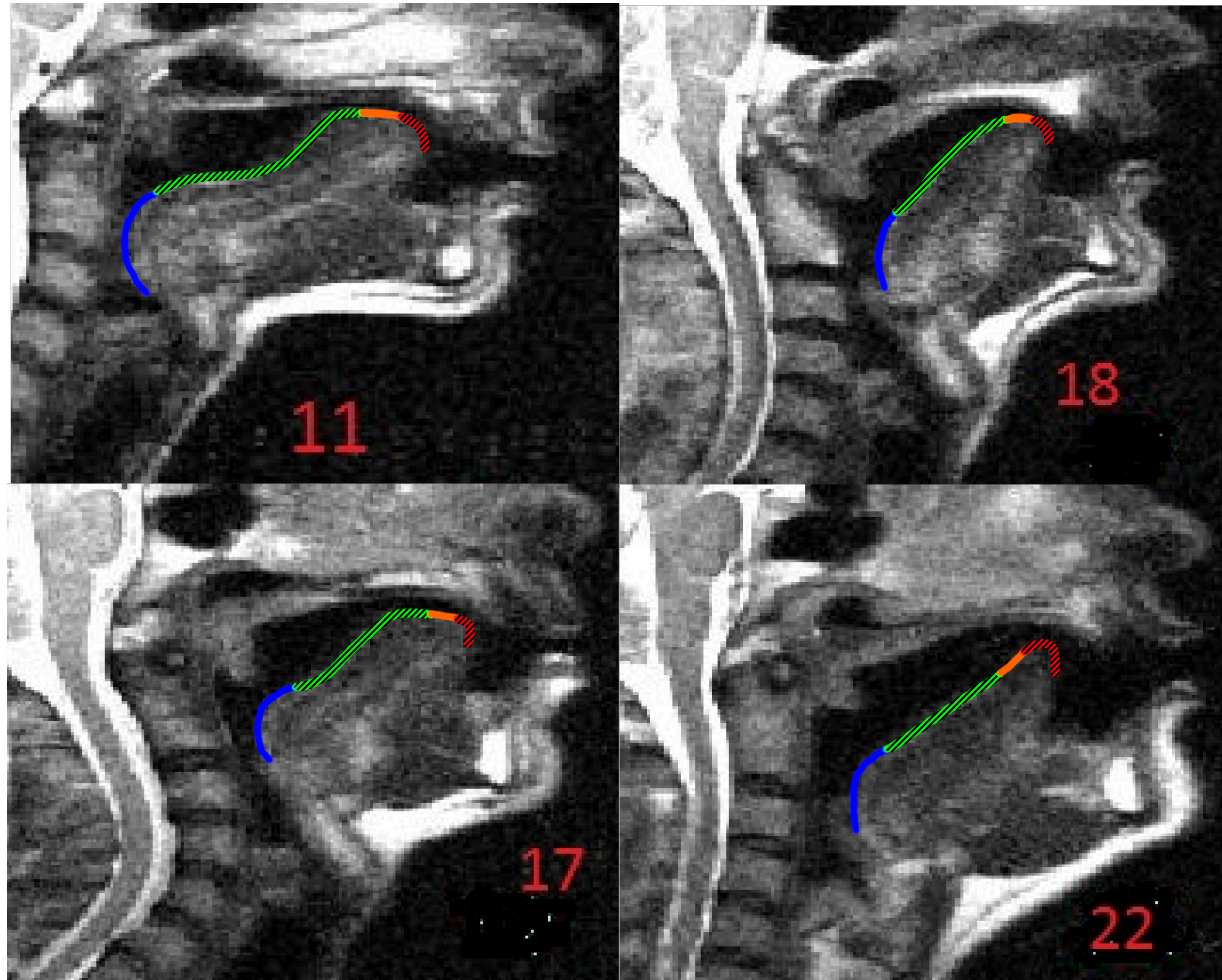

Figure B

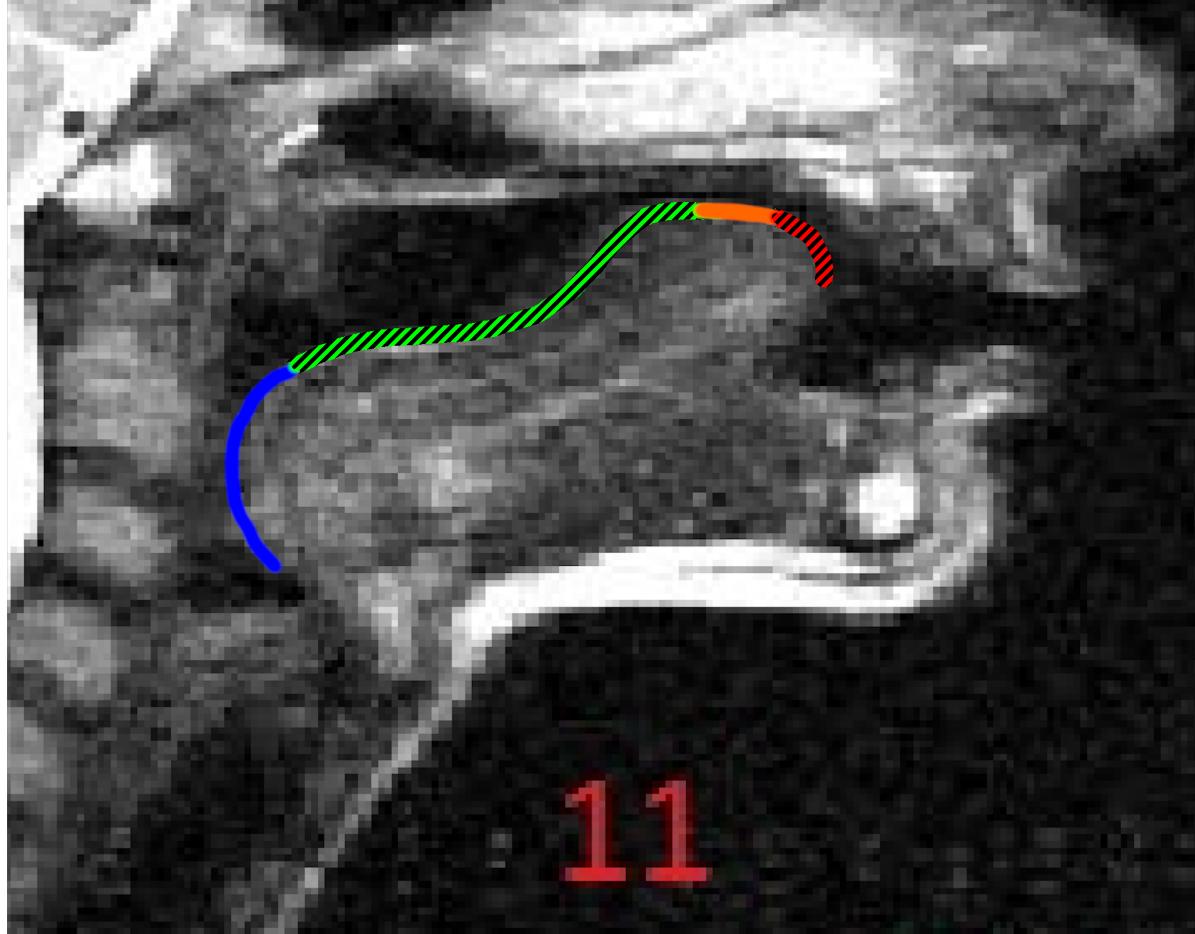

Figure C

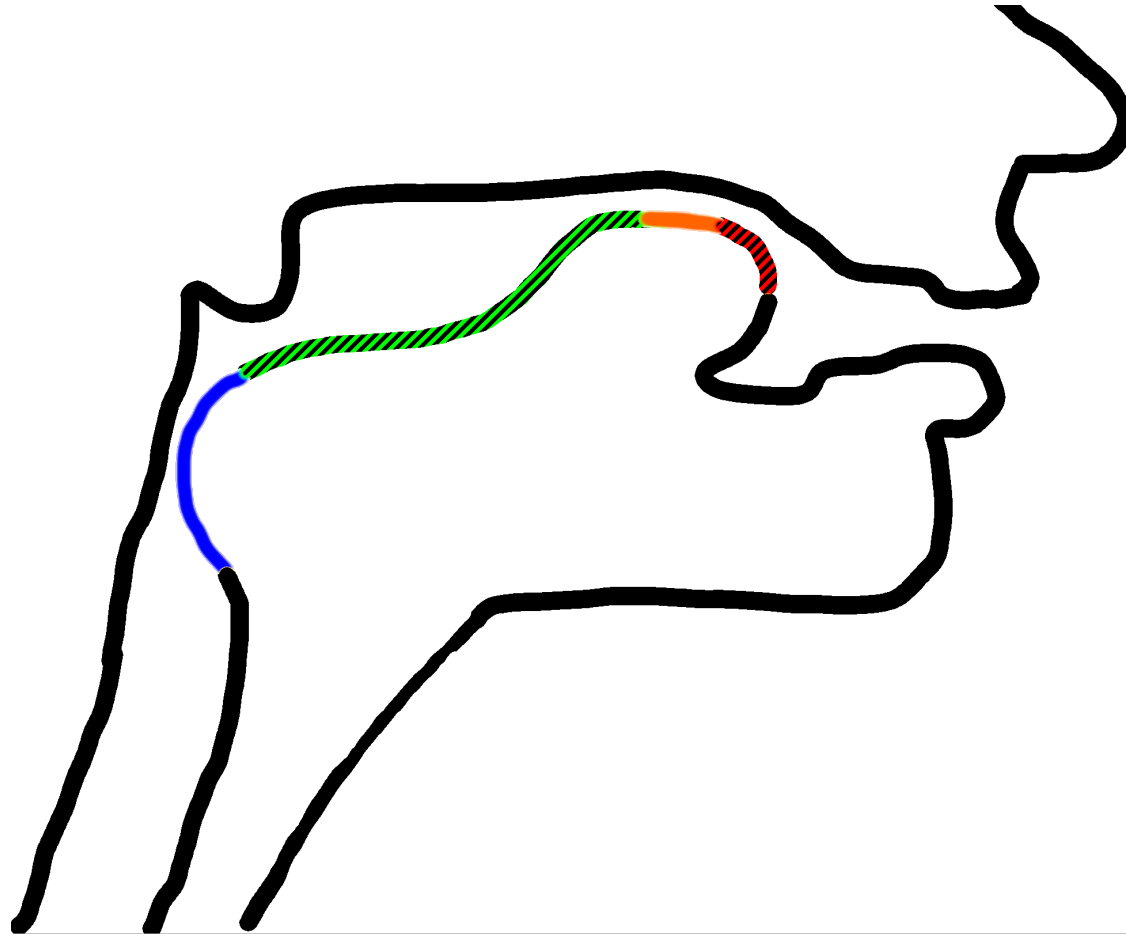

Bunched

Figure D

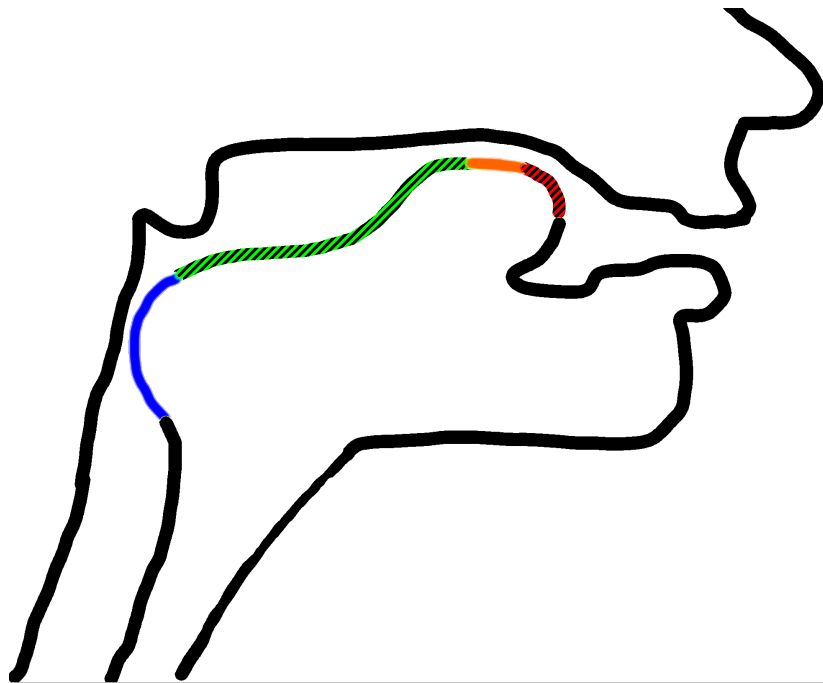

Bunched

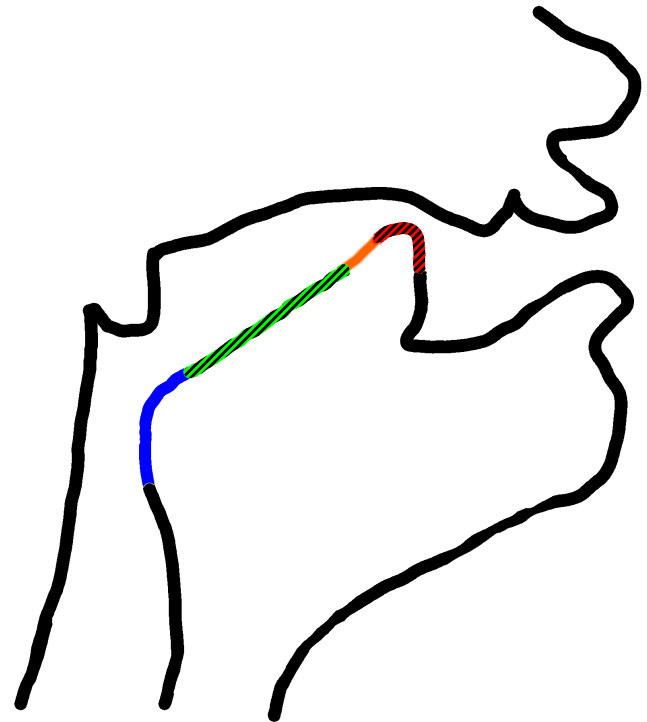

Retroflexed

Figure E

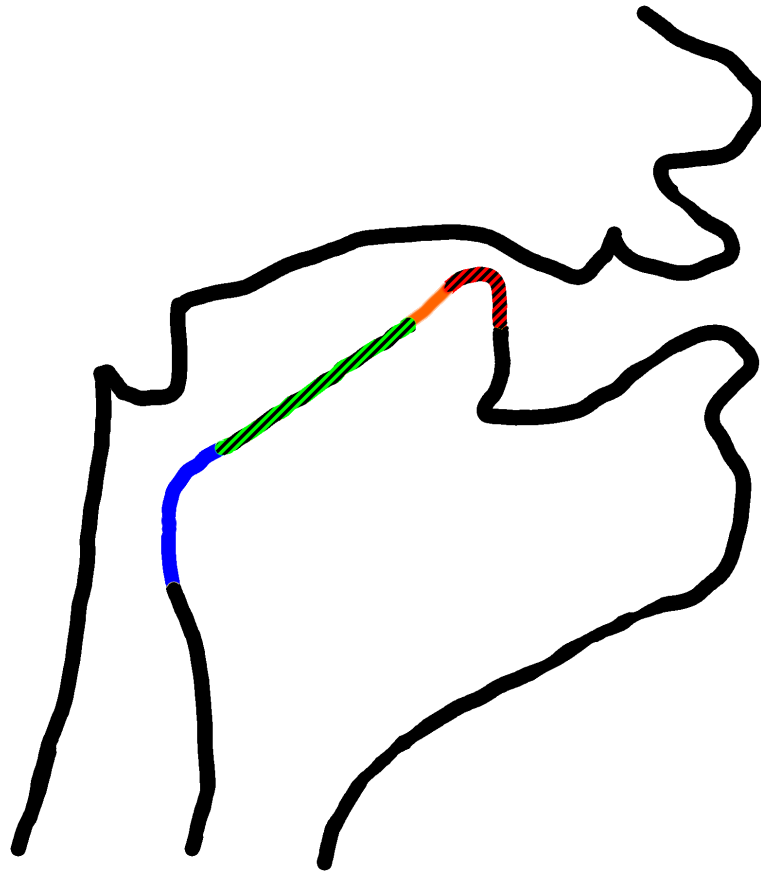

Retroflexed

Figure F

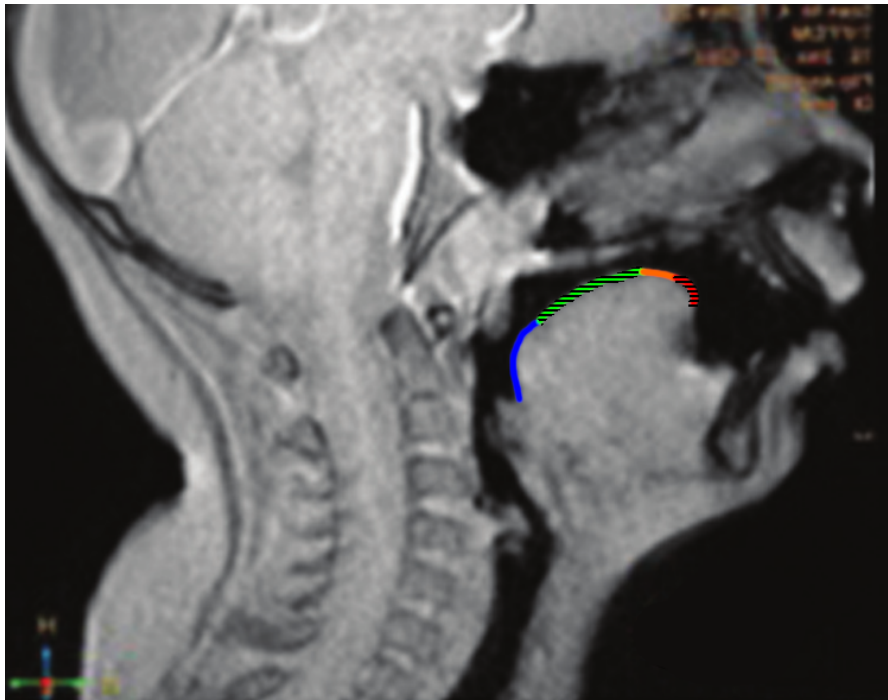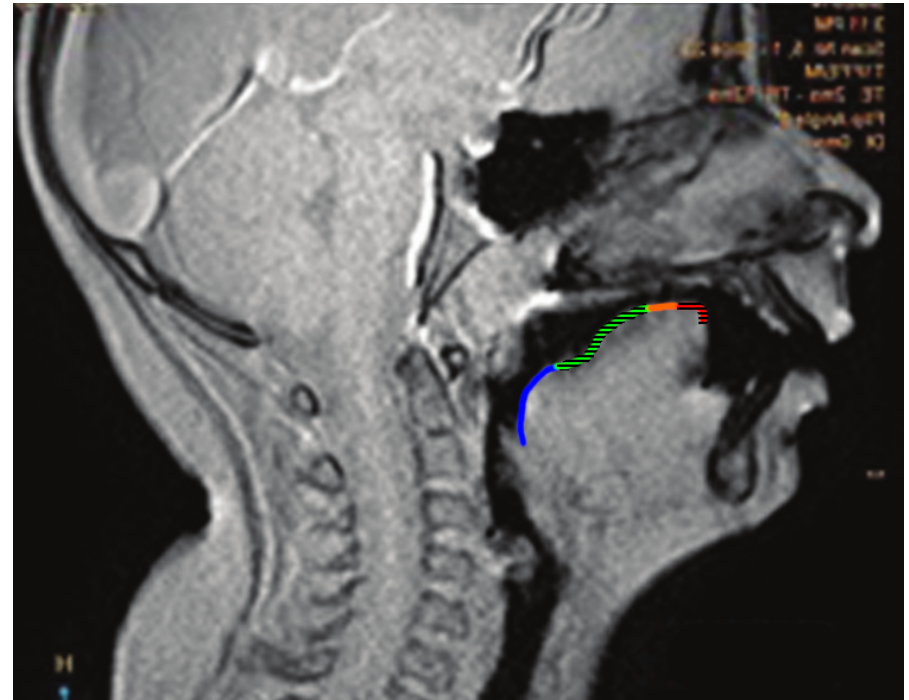

Figure G

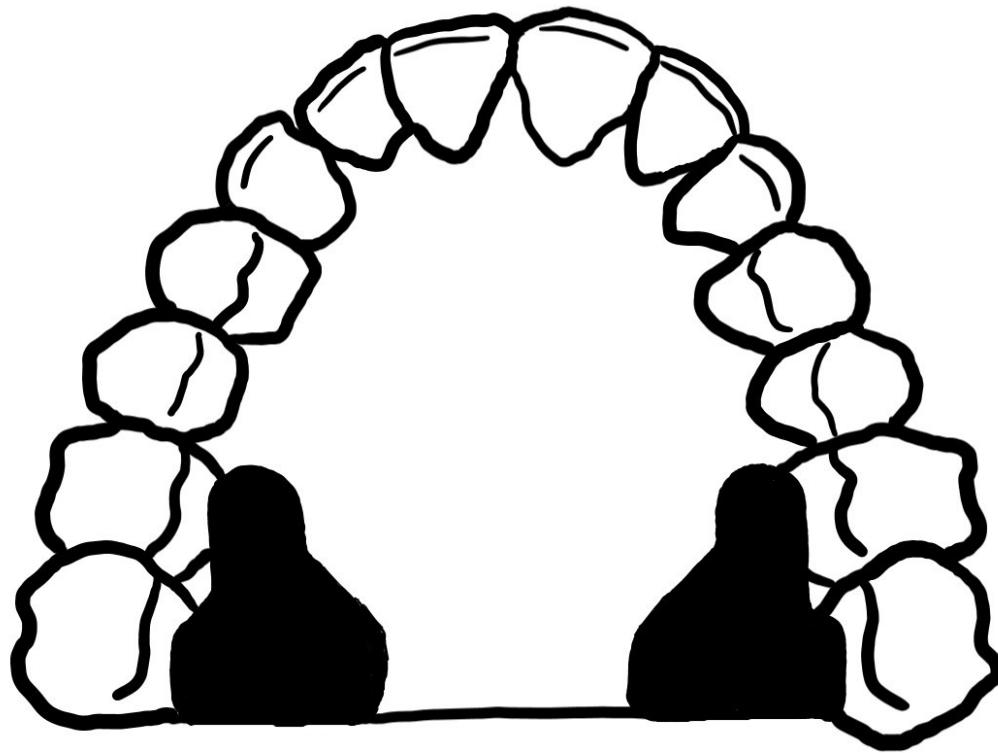

Supplement: LSHSS-51-966-s004.pdf [file LSHSS-51-966-s004.pdf]
